# Supplementary material
Source: PubMed Central journal article supplement (PMC7455022)
Supplement: NIHMS1598608-supplement-1.pdf [file NIHMS1598608-supplement-1.pdf]

**Table S1. A list of guide sequences used for CRISPR-Cas9 KO**

|                                    | Target gene          | guide sequence         |
|------------------------------------|----------------------|------------------------|
| <b>Control KO sequences</b>        | sgCTRL               | ACTATCATGGCACCCAATTG   |
|                                    | sgLACZ               | TGCGAATACGCCACGCGAT    |
| <b>Detoxifying enzyme screen</b>   | SEPHS2_g1            | GGAGGGACGGCAGTGACCGG   |
|                                    | SEPHS2_g2            | GGTGGTCTCCAGAGAAGAGG   |
|                                    | SEPHS2_g3            | GGCAGGACTTCAATAACTCG   |
|                                    | DUT_g1               | CCTGTACAGGTCGTAGCCCG   |
|                                    | DUT_g2               | TTTGCAGCCAAGCCTGACCG   |
|                                    | DUT_g3               | CCGGCTCTCCGAGCACGCCA   |
|                                    | IMPDH2_g1            | GCACAGCAGCTCTTCAACTG   |
|                                    | IMPDH2_g2            | TGGGATGGCCATAGCAATGG   |
|                                    | IMPDH2_g3            | GAGAAAATCAATGTCCCTGG   |
|                                    | ALOX15B_g1           | GCTGTTGCTGGAGCACAGGG   |
|                                    | ALOX15B_g2           | GCGGTGTCAGCTGGAACCAG   |
|                                    | ALOX15B_g3           | GGGGACCCTGGTGCTGCAGG   |
|                                    | GRHPR_g1             | GCAGCTGTGAGGTGGAGCAG   |
|                                    | GRHPR_g2             | GAGGAGGCAGAGCAGGCCGT   |
|                                    | GRHPR_g3             | GGAGACTGCGAGTTCGGCGG   |
|                                    | ADO_g1               | GACAAGCTAGACGCGGGCGG   |
|                                    | ADO_g2               | GCTGCAGTGTGGCCTTGCGC   |
|                                    | ADO_g3               | GCATGCCGTGCATGCCCGGG   |
|                                    | RDH8_g1              | GGAGGTCACGAGTCCAGGGA   |
|                                    | RDH8_g2              | GGGAAGAAGGAGACTG       |
|                                    | RDH8_g3              | TCTGGGGCAGACCCTACCG    |
|                                    | ADSS_g1              | GTTCGCCGAGACCTACCCGG   |
|                                    | ADSS_g2              | GGGCGACGAAGGCAAAGGGA   |
|                                    | ADSS_g3              | GGTGGTGGACCTGCTGGCGC   |
|                                    | NAMPT_g1             | CCGGCCCGAGATGAATCCTG   |
|                                    | NAMPT_g2             | TGTAGGAGTCGGTGGCCAGG   |
|                                    | NAMPT_g3             | GGGATGGAACACTACATTCTTG |
|                                    | COMT_g1              | ACTGTGCCGCCATCACCCAG   |
|                                    | COMT_g2              | GAACCACGTGCTGCAGCATG   |
|                                    | COMT_g3              | CCTACTGCGAGCAGAAGGAG   |
|                                    | PGP_g1               | GAACAGCAGCGTGTCCACGT   |
|                                    | PGP_g2               | GAAGACCTCCAGGCTGGCGC   |
|                                    | PGP_g3               | GAAGCCCAGGCGCTTGCCGC   |
| GDPD5_g1                           | GAGGCCAGCGATGTATGCCA |                        |
| GDPD5_g2                           | GGTCATCCTGGCTTCCACGG |                        |
| GDPD5_g3                           | GGTGGTGGCCATGTCGGCCG |                        |
| <b>Selenium metabolism related</b> | SCLY_g1              | GATGCCCGGCAGCAGTGGGG   |
|                                    | SCLY_g2              | GAAGCAGCGCGTGGATGTGG   |
|                                    | SEPSECS_g1           | GAACCGCGAGAGCTTCGCGG   |
|                                    | SEPSECS_g2           | TGAGGTGCTCATGCGAGCGG   |
|                                    | SLC3A2_g1            | TGAGTGGCAAAATATCACCA   |
|                                    | SLC3A2_g2            | CATGAGCCAGGACACCGAGG   |
|                                    | PSTK_g1              | AAACTGATCAGACACTCCGA   |
|                                    | PSTK_g2              | GGAGGCCACAGAGGACGCGAG  |

|                                 |                      |                       |
|---------------------------------|----------------------|-----------------------|
| <b>Anti-ferroptosis factors</b> | GPX4_g1              | AGAGATCAAAGAGTTCGCCG  |
|                                 | GPX4_g2              | GTGGATGAAGATCCAACCCA  |
|                                 | FSP1_g1              | GGAGAGCAGCCACATTGTGG  |
|                                 | FSP1_g2              | GCAGCTGCACGCCCTTCCGG  |
| <b>Transporter screen</b>       | IMPDH1_g1            | GCCCTGCAGGTACCTCACTG  |
|                                 | DBH_g1               | GAATGTCAGCTACACCCAGG  |
|                                 | SLC26A11_g1          | CAGGAGGGACATAATGGCGG  |
|                                 | SLC26A11_g2          | GTAGAGCCTCACCCAAACGC  |
|                                 | SLC4A1_g1            | GGAGCTGAGATGGATGGAGG  |
|                                 | SLC4A1_g2            | GCTTCCTCAAACACCAGCAG  |
|                                 | SLC4A3_g1            | GAAGTAGATGAAGAGCACAG  |
|                                 | SLC4A3_g2            | GAGGACGCCGAGCACAGCGG  |
|                                 | SLC7A11_g1           | AATGTAGCGTCCAATGCCA   |
|                                 | SLC7A11_g2           | CATGGAGCCAAAGCAGGAGA  |
|                                 | SLC39A10_g1          | CAAGATGATGATGCAAACGA  |
|                                 | SLC39A10_g2          | AACAGAGACCAATAAAACCC  |
|                                 | SLC39A14_g1          | GGAGAATGAGCAGACGGAGG  |
|                                 | SLC39A14_g2          | GGCCCACTCCCACATCCAGG  |
|                                 | SLC39A6_g1           | GGCCTGCACAATTTAGCGA   |
|                                 | SLC39A6_g2           | GAAGACAGATGACTGAAAAG  |
|                                 | SLC39A8_g1           | AGAGCTCCTTACCTAACTCG  |
|                                 | SLC39A8_g2           | GCCAGGGCTAGCCTCAGCG   |
|                                 | SLC26A10_g1          | GAAGTGCATTTAAGTCCTGG  |
|                                 | SLC26A10_g2          | AGTGTAGAGTCCAACACCG   |
|                                 | SLC26A4_g1           | CAGGTCATGGCAGCGCCAGG  |
|                                 | SLC26A4_g2           | GTTGTGAAGCCACCAACCAA  |
|                                 | SLC26A9_g1           | GAAGGACCGGACATACCCAG  |
|                                 | SLC26A9_g2           | AATCAGGATCTGCAGGCCGG  |
|                                 | SLC26A2_g1           | GGAGCCACTGCAAAACAGGA  |
|                                 | SLC26A2_g2           | GCAGGGAATAAGCAATGGAC  |
|                                 | SLC26A5_g1           | GACATGCACAGCTGCTGCGG  |
|                                 | SLC26A5_g2           | AAATCCTTGCAGCAACCCAG  |
|                                 | SLC1A4_g1            | GAGTTGCGCAATGAACACCG  |
|                                 | SLC1A4_g2            | GCAGCAGGCGTGCCAGCTGG  |
|                                 | STARD8_g1            | GAGCAGGAGGCACATTCAGG  |
|                                 | STARD8_g2            | GTAGATCTGGAGGAAAGTGG  |
|                                 | SLC13A3_g1           | GGAGGGCAAGATGCCCATGA  |
|                                 | SLC13A3_g2           | CCACATGGACAAGAACGAGG  |
|                                 | GABRA3_g1            | ATCAAGACGACAAGAACCCG  |
|                                 | GABRA3_g2            | GCATTTGGAAGATTTTCCCA  |
|                                 | KCNE4_g1             | GGTGAGGTGCACGTCCGGGG  |
|                                 | KCNE4_g2             | GCTACATGAAATCCAAGAGG  |
|                                 | ABCB4_g1             | AGAGGGGCCAGCTGAGTGG   |
|                                 | ABCB4_g2             | TGGCTGTGGGAAGAGCACGG  |
| SLC26A1_g1                      | GAGCCTCTGCAGCAGGGCAG |                       |
| SLC26A1_g2                      | AGCATCTCACGCAGACCCCG |                       |
| SLC26A7_g1                      | GCAGTTCAACAGGTGACCCA |                       |
| SLC26A7_g2                      | CAAGTGCTGCTGCCATGGGA |                       |
| <b>Etc.</b>                     | SEPHS1_g1            | GCAGGAACATCTGTAACAGG  |
|                                 | SEPHS1_g2            | CTGGATTGCTCCTGGGAGGAG |

**Table S2. List of cell lines used in the study, their sensitivity to the toxicity of SEPHS KO, and relevant information (source, validation, culture conditions)**

| SEPHS2 Sensitivity (1.0 equals viability of CTRL control cells) |                         |                                 |           |             |                  |                  |                                                      |                                                      |                                                                   |                                                                                                                                                                                                                               |
|-----------------------------------------------------------------|-------------------------|---------------------------------|-----------|-------------|------------------|------------------|------------------------------------------------------|------------------------------------------------------|-------------------------------------------------------------------|-------------------------------------------------------------------------------------------------------------------------------------------------------------------------------------------------------------------------------|
| type                                                            | origin                  | name                            | SEPHS2 g1 | SEPHS2 g2   | AVERAGE 2 GUIDES | CTRL Growth Rate | RRID                                                 | source                                               | STR profiling                                                     | culture medium                                                                                                                                                                                                                |
| non-cancer                                                      | immortalized liver      | THLE-2                          | 0.93      | 0.96        | <b>0.95</b>      | 1.13             | CVCL_3803                                            | Kind gift of the Kwan Yong Choi lab (POSTECH, KOREA) | Yes, Confirmed                                                    | BEBM, 10% FBS, 5ng/ml EGF, 70ng/ml phosphoethanolamine, additives (include BPE, insulin, hydrocortisone, retinoic acid, transferrin, triiodothyronine and hEGF/ discard GA-1000 and Epinephrine) from BEGM Bullet Kit (Lonza) |
|                                                                 | normal colon fibroblast | CCD-18Co                        | 1.18      | 0.97        | <b>1.08</b>      | 2.35             | CVCL_2379                                            |                                                      | Yes, Confirmed                                                    | EMEM, 10% FBS, 100units/ml penicillin and streptomycin                                                                                                                                                                        |
|                                                                 | immortalized breast     | MCF10A                          | 0.94      | 0.87        | <b>0.90</b>      | 5.12             | CVCL_0598                                            |                                                      | Yes, Confirmed                                                    | DMEM/F12, 5 %horse serum, 20ng/ml EGF, 0.5µg/ml hydrocortisone, 100ng/ml cholera toxin, 10µg/ml insulin, 100units/ml penicillin and streptomycin                                                                              |
|                                                                 | immortalized breast     | MCF12A                          | 0.88      | 0.83        | <b>0.86</b>      | 1.79             | CVCL_3744                                            | Kind gift of the Michael Green lab (UMMS, USA)       | Yes, Confirmed                                                    | DMEM/F12, 5 %horse serum, 20ng/ml EGF, 0.5µg/ml hydrocortisone, 100ng/ml cholera toxin, 10µg/ml insulin, 100units/ml penicillin and streptomycin                                                                              |
|                                                                 | prostate                | PNT1a                           | 0.93      | 0.81        | <b>0.87</b>      | 2.36             |                                                      | Kind gift of the Arthur Mercurio lab (UMMS, USA)     | Yes, Confirmed *(PubMed=11416159)                                 | RPMI, 10% FBS, 100 units/ml penicillin and streptomycin                                                                                                                                                                       |
|                                                                 | Primary lung            | Lung Fibroblast (LF), human     | 0.99      | 0.84        | <b>0.92</b>      | 2.24             |                                                      | ATCC                                                 | purchased in 2018 December                                        | Fibroblast Basal Medium, 2% FBS, 5 ng/ml rhFGFb, 7. mM L-Glutamine, 50µg/mL, Hydrocortisone Hemisuccinate1 µg/mL, rh Insulin5 µg/mL                                                                                           |
|                                                                 | Primary lung            | Lung Smooth Muscle (LSM), human | 1.05      | 0.92        | <b>0.98</b>      | 2.76             |                                                      |                                                      | purchased in 2018 December                                        | Vascular Cell Basal Medium, 5% FBS, 5ng/mL rh FGF-basic, 5µg/mL rh Insulin, 50µg/mL Ascorbic acid, 10mM L-Glutamine, 5ng/mL rh EGF                                                                                            |
| cancer                                                          | bone                    | U2OS                            | 0.54      | 0.42        | <b>0.48</b>      | 6.46             | CVCL_0042                                            | Kind gift of the David Sabatini lab (MIT, USA)       | Yes, Confirmed                                                    | DMEM, 10% FBS, 20mM L-Glutamin, 100 units/ml penicillin and streptomycin                                                                                                                                                      |
|                                                                 | brain                   | U251                            | 0.36      | 0.37        | <b>0.37</b>      | 9.59             | CVCL_0021                                            |                                                      | Yes, Confirmed                                                    |                                                                                                                                                                                                                               |
|                                                                 | brain                   | LN229                           | 1.11      | 0.86        | <b>0.99</b>      | 5.35             | CVCL_0393                                            |                                                      | Yes, Confirmed                                                    |                                                                                                                                                                                                                               |
|                                                                 | breast                  | CAL120                          | 0.63      | 0.55        | <b>0.59</b>      | 4.85             | CVCL_1104                                            |                                                      | Yes, Confirmed                                                    |                                                                                                                                                                                                                               |
|                                                                 | breast                  | MDA-MB415                       | 0.92      | 1.04        | <b>0.98</b>      | 2.60             | CVCL_0621                                            |                                                      | Yes, Confirmed                                                    |                                                                                                                                                                                                                               |
|                                                                 | breast                  | MDA-MB468                       | 0.66      | 0.56        | <b>0.61</b>      | 2.47             | CVCL_0419                                            |                                                      | Yes, Confirmed                                                    |                                                                                                                                                                                                                               |
|                                                                 | breast                  | MDA-MB231                       | 0.46      | 0.33        | <b>0.39</b>      | 4.19             | CVCL_0062                                            |                                                      | Yes, Confirmed                                                    |                                                                                                                                                                                                                               |
|                                                                 | breast                  | Hs578T                          | 1.27      | 0.81        | <b>1.04</b>      | 2.69             | CVCL_0332                                            |                                                      | Yes, Confirmed                                                    |                                                                                                                                                                                                                               |
|                                                                 | colon                   | SW620                           | 0.75      | 0.66        | <b>0.70</b>      | 10.35            | CVCL_0547                                            |                                                      | Yes, Confirmed                                                    |                                                                                                                                                                                                                               |
|                                                                 | connective tissue       | HT1080                          | 0.60      | 0.33        | <b>0.47</b>      | 5.71             | CVCL_0317                                            |                                                      | Yes, Confirmed                                                    |                                                                                                                                                                                                                               |
|                                                                 | kidney                  | A498                            | 0.40      | 0.42        | <b>0.41</b>      | 3.47             | CVCL_1056                                            |                                                      | Yes, Confirmed                                                    |                                                                                                                                                                                                                               |
|                                                                 | kidney                  | Caki-1                          | 0.76      | 0.69        | <b>0.73</b>      | 3.52             | CVCL_0234                                            |                                                      | Yes, Confirmed                                                    |                                                                                                                                                                                                                               |
|                                                                 | skin                    | A2058                           | 0.39      | 0.37        | <b>0.38</b>      | 2.87             | CVCL_1059                                            |                                                      | Yes, Confirmed                                                    |                                                                                                                                                                                                                               |
|                                                                 | prostate                | DU145                           | 0.56      | 0.35        | <b>0.46</b>      | 4.37             | CVCL_0105                                            |                                                      | Yes, Confirmed                                                    |                                                                                                                                                                                                                               |
|                                                                 | brain                   | U118**                          | 0.75      | 0.71        | <b>0.73</b>      | 6.55             | CVCL_0633                                            |                                                      | Yes, Confirmed                                                    |                                                                                                                                                                                                                               |
|                                                                 | kidney                  | A549                            | 0.94      | 0.68        | <b>0.81</b>      | 6.95             | CVCL_0023                                            |                                                      | Yes, Confirmed                                                    |                                                                                                                                                                                                                               |
|                                                                 | skin                    | WM115                           | 1.06      | 1.01        | <b>1.04</b>      | 1.67             | CVCL_0040                                            |                                                      | Yes, Confirmed                                                    |                                                                                                                                                                                                                               |
|                                                                 | breast                  | Sum159                          | 0.90      | 0.71        | <b>0.81</b>      | 4.79             | CVCL_5423                                            | Kind gift of the Leslie Shaw lab (UMMS, USA)         | Untested                                                          |                                                                                                                                                                                                                               |
|                                                                 | breast                  | MDA-MB157                       | 0.80      | 0.53        | <b>0.67</b>      | 2.61             | CVCL_0618                                            | Kind gift of the Michael Lee lab (UMMS, USA)         | Yes, Confirmed                                                    |                                                                                                                                                                                                                               |
|                                                                 | breast                  | HCC1395                         | 0.42      | 0.38        | <b>0.40</b>      | 6.20             | CVCL_1249                                            |                                                      | Untested                                                          |                                                                                                                                                                                                                               |
| breast                                                          | MDA-MB436               | 0.69                            | 0.49      | <b>0.59</b> | 2.00             | CVCL_0623        | Untested                                             |                                                      |                                                                   |                                                                                                                                                                                                                               |
| liver                                                           | Huh7                    | 0.52                            | 0.52      | <b>0.52</b> | 1.19             | CVCL_0336        | Kind gift of the Kwan Yong Choi lab (POSTECH, KOREA) | Yes, Confirmed*                                      |                                                                   |                                                                                                                                                                                                                               |
| breast                                                          | MCF10CA1h               | 0.34                            | 0.32      | 0.33        | 37               | CVCL_6683        | Kind gift of the Michael Green lab (UMMS, USA)       | Untested                                             | DMEM/F12, 5 %horse serum, 100units/ml penicillin and streptomycin |                                                                                                                                                                                                                               |

\* 4/4 loci matched but that reference data was not available for other loci that we tested.

\*\*U118 is on the list of commonly misidentified lines as it is thought to be identical to U138, another glioma cell line

**Table S3. Materials used in the study**

| Type of material                                                                                | Source                        | Catalogue #                |
|-------------------------------------------------------------------------------------------------|-------------------------------|----------------------------|
| <b>Chemicals and kits</b>                                                                       |                               |                            |
| Sodium selenite                                                                                 | Sigma-Aldrich                 | Cat#S5261                  |
| Sodium selenide                                                                                 | Santa Cruz                    | Cat#sc-272495              |
| L-Glutathione reduced                                                                           | Sigma-Aldrich                 | Cat#G4251                  |
| tert-Butyl hydroperoxide                                                                        | Sigma-Aldrich                 | Cat#458139                 |
| Hydrogen peroxide                                                                               | Sigma-Aldrich                 | Cat#H1009                  |
| Ferostatin-1                                                                                    | Sigma-Aldrich                 | Cat#SML0584                |
| Liproxatin                                                                                      | Sigma-Aldrich                 | Cat#SML1414                |
| Z-VAD-FMK                                                                                       | Santa Cruz                    | Cat#sc3067                 |
| Necrostatin-1                                                                                   | Cayman                        | Cat#11658                  |
| L-Cysteine                                                                                      | Sigma-Aldrich                 | Cat#C7352                  |
| Polyvinylpyrrolidone                                                                            | Sigma-Aldrich                 | Cat#81440                  |
| Silver nitrate                                                                                  | Sigma-Aldrich                 | Cat#209139                 |
| Lead acetate                                                                                    | Sigma-Aldrich                 | Cat#467863                 |
| MOPS-SDS Running Buffer                                                                         | Boston Bio Products           | Cat#BP-178                 |
| TBS-T                                                                                           | Boston Bio Products           | Cat#BB-181                 |
| Borg Decloaker                                                                                  | Biocare medical               | Cat#BD1000                 |
| Crystal violet                                                                                  | Sigma-Aldrich                 | Cat#C0775                  |
| Erastin                                                                                         | Sigma-Aldrich                 | Cat#E7781                  |
| 5,5'-Dithiobis(2-nitrobenzoic acid)                                                             | Sigma-Aldrich                 | Cat#D8130                  |
| Basement Membrane Matrix                                                                        | Trevigen                      | Cat#3432-005-01            |
| X-tremeGENE 9 Transfection reagent                                                              | Roche                         | Cat#XTG9-RO                |
| Polybrene                                                                                       | EMD Millipore                 | Cat#TR-1003-G              |
| Puromycin                                                                                       | Corning                       | Cat#61-385-RA              |
| Blasticidin                                                                                     | Thermo Fisher Scientific      | Cat#R21001                 |
| Nitric acid (HNO <sub>3</sub> )                                                                 | Sigma-Aldrich                 | Cat# 438073                |
| Perchloric acid (HClO <sub>4</sub> )                                                            | Sigma-Aldrich                 | Cat# 311413                |
| Hydrochloric acid (HCl)                                                                         | Sigma-Aldrich                 | Cat# 320331                |
| Ethylenediaminetetraacetic acid (EDTA)                                                          | EMD Millipore                 | Cat# 324503                |
| 2,3-diaminonaphthalene-HCl (DAN)                                                                | ChemSavers                    | 23DANH1G                   |
| Cyclohexane                                                                                     | Sigma-Aldrich                 | Cat# 650455                |
| CellTiter-Glo solution                                                                          | Promega                       | Cat#G7570                  |
| ABC HRP Kit                                                                                     | Vector Laboratories           | Cat#PK-6200                |
| DAB substrate kit                                                                               | Abcam                         | Cat#ab64238                |
| RNAscope Pretreatment reagents (hydrogen peroxide, protease plus, and target retrieval)         | Advanced Cell Diagnostics     | Cat#322381                 |
| RNAscope Multiplex fluorescent detection reagents v2 (AMP1, AMP2, AMP3, HRP-C1 and HRP-blocker) | Advanced Cell Diagnostics     | Cat#323110                 |
| RNAscope Multiplex TSA buffer                                                                   | Advanced Cell Diagnostics     | Cat#322809                 |
| TSA plus fluorescein                                                                            | Perkin Elmer                  | Cat#NEL741001KT            |
| SEPHS2 (human) RNAscope probe                                                                   | Advanced Cell Diagnostics     | Cat#843901                 |
| RNAscope 3-plex positive control probe                                                          | Advanced Cell Diagnostics     | Cat#320881                 |
| RNAscope 3-plex negative control probe                                                          | Advanced Cell Diagnostics     | Cat#320871                 |
| Vectashield antifade mounting media with DAPI                                                   | Vector Laboratories           | Cat#H-1200                 |
| FITC Annexin V Apoptosis Detection Kit I                                                        | BD Pharmingen                 | Cat#556547                 |
| DCFDA / H2DCFDA - Cellular ROS Assay Kit                                                        | Abcam                         | Cat#ab113851               |
| Peptide                                                                                         |                               |                            |
| Acetyl-[Sec]K[Sec]NLNGRKKRRQRRRPQ                                                               | ThermoFisher                  | Cat#PEP95MODINTO<br>T      |
| <b>Recombinant DNA</b>                                                                          |                               |                            |
| lentiCRISPR v2                                                                                  | (Sanjana et al., 2014)        | Addgene plasmid #<br>52961 |
| pLV-EF1a-IRES-Blast                                                                             | (Hayer et al., 2016)          | Addgene plasmid #<br>85133 |
| pMD154                                                                                          | Scot Wolfe Lab                | N/A                        |
| Mice                                                                                            |                               |                            |
| Athymic NCI-nu, Female                                                                          | Charles River<br>Laboratories | N/A                        |
| <b>Oligonucleotides</b>                                                                         |                               |                            |
| Primer for cloning SEPHS2 cDNA,                                                                 |                               |                            |
| Forward:                                                                                        |                               |                            |
| GGCGGATCCGCCACCATGGCGGAAGCCTCGGCGACGGGCGCCTGC                                                   | This paper                    | N/A                        |
| Reverse:                                                                                        |                               |                            |
| GGCGGCGCCGCCACCTCACGAGCTAGGCTCAGAGGAGGCATTTGA                                                   |                               |                            |
| Primer for cloning CAT cDNA,                                                                    |                               |                            |
| Forward: GGCACGCGTGCACCATGGCTGACAGCCGGGATCCCGCCAGCGAC                                           | This paper                    | N/A                        |
| Reverse: GGCGTAAACGCCACCTCACAGATTTGCCCTTCCCTTGCCGCCAA                                           |                               |                            |
| Primer for SDM SEPHS2 U60C                                                                      |                               |                            |
| Forward: CCGGCATGAAGGGCTGTGGCTGC                                                                | This paper                    | N/A                        |
| AAGGTCCCGCAGGAGGCGC (Genewiz)                                                                   |                               |                            |
| Reverse: GCGGACCTTGACGACACAGCCC                                                                 |                               |                            |
| TTCATGCCGGAAGCCC (Genewiz)                                                                      |                               |                            |
| Primer for SDM CRISPR resistant SEPHS2 clone 1                                                  |                               |                            |
| Forward:                                                                                        |                               |                            |
| GATGCGGCTGAGGAAGGAGGGACGGCAGTTACTGGTGGGCAAACGGTGGTCAACCCCTGG                                    | This paper                    | N/A                        |
| Reverse:                                                                                        |                               |                            |
| CCAAGGGTTGACCACCGTTTGCCACACAGTAACTGCCCTCCCTCCTCAGCCGCATC                                        |                               |                            |
| Primer for SDM CRISPR resistant SEPHS2 clone 1                                                  |                               |                            |
| Forward:                                                                                        |                               |                            |
| GATGCGGCTGAGGAAGGAGGGACCGCGTTACTGGTGGGCAAACGGTGGTCAACCCCTGG                                     | This paper                    | N/A                        |
| Reverse:                                                                                        |                               |                            |
| CCAAGGGTTGACCACCGTTTGCCACACAGTAAACGGCGGTCCTCCTCCTCAGCCGCATC                                     |                               |                            |
| Guide sequences for CRISPR                                                                      | (Wang et al., 2014)           | N/A                        |
| See Supplementary Table S1                                                                      |                               |                            |
| <b>Software</b>                                                                                 |                               |                            |
| Prism version 8                                                                                 | GraphPad                      | N/A                        |
| Image J version 1.52o                                                                           | N/A                           | N/A                        |
| FlowJo version 10                                                                               | BD                            | N/A                        |
| ChemDraw Professional                                                                           | Version 18.0.0.231            | N/A                        |

|                                                   |                           |                |
|---------------------------------------------------|---------------------------|----------------|
| Gen5 software                                     | BioTek                    | N/A            |
| <b>Antibodies for Western blots</b>               |                           |                |
| Rabbit polyclonal anti-SEPHS2                     | Sigma-Aldrich             | Cat#SAB2700271 |
| Rabbit polyclonal anti-PSTK                       | Invitrogen                | Cat#PA5-58101  |
| Rabbit monoclonal anti-GPX4                       | Abcam                     | Cat#ab125066   |
| Rabbit polyclonal anti-GPX1                       | Abcam                     | Cat#ab22604    |
| Rabbit monoclonal anti-xCT/SLC7A11                | Cell signaling Technology | Cat#12691      |
| Rabbit polyclonal anti-SLC3A2                     | Sigma-Aldrich             | Cat#HPA017980  |
| Rabbit polyclonal anti-SELS (C11ORF31)            | Sigma-Aldrich             | Cat#HPA048362  |
| Rabbit polyclonal anti-SELH (VIMP)                | Sigma-Aldrich             | Cat#HPA010025  |
| Rabbit monoclonal anti-Catalase (D4P7B)           | Cell signaling Technology | Cat#12980T     |
| Mouse monoclonal anti-SEPHS1 (F-6)                | Santa Cruz                | Cat#sc-365945  |
| Mouse monoclonal anti-AMID (B-6)                  | Santa Cruz                | Cat#sc-377120  |
| Mouse monoclonal anti- $\beta$ -Actin             | Sigma-Aldrich             | Cat#A2228      |
| Rabbit monoclonal anti- $\beta$ -Actin (13E5)     | Cell signaling Technology | Cat#4970       |
| <b>Antibodies for ICC and IHC</b>                 |                           |                |
| Rabbit polyclonal anti-Cleaved Caspase-3 (Asp175) | Cell signaling Technology | Cat#9661       |
| Goat anti-Rabbit IgG H&L (Alexa Fluor® 488)       | Abcam                     | Cat#ab150077   |
| Rabbit monoclonal anti-GPX4                       | Abcam                     | Cat#ab125066   |
| Rabbit polyclonal Anti-CA9                        | Sigma-Aldrich             | Cat#HPA055207  |
| Mouse monoclonal PECAM-1 Antibody (10G9)          | Santa Cruz                | Cat#sc-13537   |
| Mouse monoclonal anti-MKI67                       | Sigma-Aldrich             | Cat#AMAB90870  |
